# Supplementary material for: Auditory Countermeasures for Sleep Inertia: Exploring the Effect of Melody and Rhythm in an Ecological Context
Source: PubMed Central journal article supplement (PMC7445849; doi:10.3390/clockssleep2020017), 2020-05-29
Supplement: clockssleep-02-00017-s001.pdf [file clockssleep-02-00017-s001.pdf]

# **Auditory Countermeasures for Sleep Inertia: Exploring the Effect of Melody and Rhythm in an Ecological Context.**

## **Supporting Information**

### **Test Questionnaire**

Stuart J. McFarlane<sup>1\*</sup>, Jair E. Garcia<sup>1</sup>, Darrin S. Verhagen<sup>2</sup>, Adrian G. Dyer<sup>1</sup>.

<sup>1</sup>School of Media and Communication, RMIT University, Melbourne, Vic, 3001, Australia.

<sup>2</sup>School of Design, RMIT University, Melbourne, Vic, 3001, Australia.

# Test Session 1.

## OPENING PAGE

**Good Morning!**

**Welcome to the Waking Sound and Sleep Inertia Study!**

**Please follow the prompts carefully as they will guide you through the test.**

**By completing this test, you are giving your consent to participate in the study.**

### ITEM 1.

#### PVT Test

### ITEM 2.

| <b>Please, indicate your sleepiness during the 5 minutes before this rating through ticking the appropriate description.</b> |                   |              |                     |                                    |                                    |                                                  |                                                |                                                                               |
|------------------------------------------------------------------------------------------------------------------------------|-------------------|--------------|---------------------|------------------------------------|------------------------------------|--------------------------------------------------|------------------------------------------------|-------------------------------------------------------------------------------|
| 1 =<br>EXTREMELY<br>ALERT                                                                                                    | 2 =<br>VERY ALERT | 3 =<br>ALERT | 4 =<br>RATHER ALERT | 5 =<br>NEITHER ALERT<br>NOR SLEEPY | 6 =<br>SOME SIGNS OF<br>SLEEPINESS | 7 =<br>SLEEPY, BUT NO<br>EFFORT TO<br>KEEP AWAKE | 8 =<br>SLEEPY, SOME<br>EFFORT TO<br>KEEP AWAKE | 9 =<br>VERY SLEEPY,<br>GREAT EFFORT<br>TO KEEP<br>AWAKE,<br>FIGHTING<br>SLEEP |

### ITEM 3.

| <b>Please indicate as accurately as possible how many hours you slept last night.</b> |         |         |         |         |         |         |         |         |         |         |         |         |    |
|---------------------------------------------------------------------------------------|---------|---------|---------|---------|---------|---------|---------|---------|---------|---------|---------|---------|----|
| - 3                                                                                   | 3 - 3.5 | 3.5 - 4 | 4 - 4.5 | 4.5 - 5 | 5 - 5.5 | 5.5 - 6 | 6 - 6.5 | 6.5 - 7 | 7 - 7.5 | 7.5 - 8 | 8 - 8.5 | 8.5 - 9 | 9+ |

### ITEM 4.

| <b>How would you describe your quality of sleep?</b> |      |         |      |           |
|------------------------------------------------------|------|---------|------|-----------|
| VERY POOR                                            | POOR | AVERAGE | GOOD | VERY GOOD |

### ITEM 5.

| <b>What is your age range?</b> |         |         |         |     |
|--------------------------------|---------|---------|---------|-----|
| 18 - 29                        | 30 - 39 | 40 - 49 | 50 - 59 | 60+ |

### ITEM 6.

| <b>What is your gender?</b> |        |                                           |                        |
|-----------------------------|--------|-------------------------------------------|------------------------|
| MALE                        | FEMALE | X<br>(INDETERMINATE/INTERSEX/UNSPECIFIED) | PREFER NOT TO DISCLOSE |

**ITEM 7.**

| <i>How many hours do you typically sleep each night?</i> |     |     |     |    |
|----------------------------------------------------------|-----|-----|-----|----|
| 0-3                                                      | 3-5 | 5-7 | 7-9 | 9+ |

**CLOSING PAGE**

---

***You are all done!***

***If you are feeling drowsy and must operate any heavy machinery, drive or complete tasks of a consequential nature, the research team recommends that you wait until your drowsiness subsides.***

***See you tomorrow!***

---

# Test Session 2.

## OPENING PAGE

---

*Good Morning!*

*Welcome back!*

*Please follow the prompts carefully as they will guide you through the test.  
Please begin by pressing the resume button.*

---

### ITEM 1.

#### PVT Test

### ITEM 2.

***Please, indicate your sleepiness during the 5 minutes before this rating through ticking the appropriate description.***

|                           |                   |              |                     |                                    |                                    |                                                  |                                                |                                                                               |
|---------------------------|-------------------|--------------|---------------------|------------------------------------|------------------------------------|--------------------------------------------------|------------------------------------------------|-------------------------------------------------------------------------------|
| 1 =<br>EXTREMELY<br>ALERT | 2 =<br>VERY ALERT | 3 =<br>ALERT | 4 =<br>RATHER ALERT | 5 =<br>NEITHER ALERT<br>NOR SLEEPY | 6 =<br>SOME SIGNS OF<br>SLEEPINESS | 7 =<br>SLEEPY, BUT NO<br>EFFORT TO<br>KEEP AWAKE | 8 =<br>SLEEPY, SOME<br>EFFORT TO<br>KEEP AWAKE | 9 =<br>VERY SLEEPY,<br>GREAT EFFORT<br>TO KEEP<br>AWAKE,<br>FIGHTING<br>SLEEP |
|---------------------------|-------------------|--------------|---------------------|------------------------------------|------------------------------------|--------------------------------------------------|------------------------------------------------|-------------------------------------------------------------------------------|

### ITEM 3.

***Please indicate as accurately as possible how many hours you slept last night.***

|     |         |         |         |         |         |         |         |         |         |         |         |         |    |
|-----|---------|---------|---------|---------|---------|---------|---------|---------|---------|---------|---------|---------|----|
| - 3 | 3 - 3.5 | 3.5 - 4 | 4 - 4.5 | 4.5 - 5 | 5 - 5.5 | 5.5 - 6 | 6 - 6.5 | 6.5 - 7 | 7 - 7.5 | 7.5 - 8 | 8 - 8.5 | 8.5 - 9 | 9+ |
|-----|---------|---------|---------|---------|---------|---------|---------|---------|---------|---------|---------|---------|----|

### ITEM 4.

***How would you describe your quality of sleep?***

|           |      |         |      |           |
|-----------|------|---------|------|-----------|
| VERY POOR | POOR | AVERAGE | GOOD | VERY GOOD |
|-----------|------|---------|------|-----------|

## CLOSING PAGE

---

*You are all done!*

*If are feeling drowsy and must operate any heavy machinery, drive or complete tasks of a consequential nature, the research team recommends that you wait until your drowsiness subsides.*

*Please press the finish button to submit your results.*

*On behalf of the research team we would like to thank you for taking time to take part in this study!*

---
